# Supplementary material for: New insights into non-contact reflectance IR mapping of teeth
Source: Royal Society of Chemistry journal article supplement (doi:10.1039/d5fd00026b), 2025-01-01
Supplement: d5fd00026b1.pdf [file d5fd00026b1.pdf]

## Supplementary

### KKT Transformation code

The in-house code is in the following link: <https://github.com/olelenz/FTIR-Kramers-Kronig-Lizzi-Lenz>

To use the program, it is necessary to download the referenced code and execute it in a terminal. Python version 3.8 or higher is required. Once inside the project folder, 'pip install -r requirements.txt' must be executed to install the required Python modules. The program is called with two arguments, a path to the .xlsx file containing the input data and a path to the desired output file. If the output file is not present, it will be generated. In addition to the results in the form of a text file, a subdirectory containing a plot for each input row is created.
